# Supplementary material for: Improved Immune Responses Against Zika Virus After Sequential Dengue and Zika Virus Infection in Humans
Source: MDPI journal article supplement (doi:10.3390/v10090480), 2018-09-07
Supplement: s1 [file s1]

Fig. S1: Comparison of the neutralization activity against ZIKV and DENV1-4 infection between plasma samples from all donors in the study cohort. Neutralization activity against ZIKV and DENV infection using plasma samples from Naïve donors (left panels), DENV-immune ZIKV-naïve (group A) donors (DENV donors, middle left panels), ZIKV-immune DENV-naïve (group B) donors (ZIKV donors, middle right panels) and DENV/ZIKV-immune (groups C, D and E) donors (DENV/ZIKV donors, right panels).
