# Supplementary material for: Improved Immune Responses Against Zika Virus After Sequential Dengue and Zika Virus Infection in Humans
Source: MDPI journal article supplement (doi:10.3390/v10090480), 2018-09-07
Supplement: s1 [file s1]

**Table S1. Characteristics of antigenic peptides from ZIKV identified in this study**

| Peptide <sup>a</sup>   | Sequence <sup>b</sup>              | Donors <sup>c</sup> | HLA <sup>d</sup>                                             | SFC/million<br>PBMC <sup>e</sup> |       | Predicted epitope | Predicted<br>HLA | Score<br>(rank) <sup>f</sup> |
|------------------------|------------------------------------|---------------------|--------------------------------------------------------------|----------------------------------|-------|-------------------|------------------|------------------------------|
|                        |                                    |                     |                                                              | 15-mer                           | 9-mer |                   |                  |                              |
| C <sub>13-27</sub>     | IVNML <u>MLKRG</u> VARVSPF         | 28 (C)              | A <u>02</u> ,29; B40,44; C03,16; DRB104,07                   | 170                              | <20   | MLKRGVARV         | A0217            | 1.9                          |
|                        |                                    | 60 (B)              | A <u>02</u> ,69; B55,58; C01,07; DRB111,13                   | 50                               | 60    |                   | A0205            | 1.3                          |
| C <sub>85-99</sub>     | KKDLA <u>AAMLRI</u> INARK          | 26 (D)              | A <u>02</u> ,24; B07,48; C01,07; DRB114,15                   | 100                              | <20   | AAMLRIINA         | A0201            | 4.5                          |
|                        |                                    | 60 (B)              | A <u>02</u> ,69; B55,58; C01,07; DRB111,13                   | <20                              | 75    | KDLAAMLRI         | B5501            | 1.4                          |
|                        | KKDLA <u>AAMLRI</u> INARK          | 28 (C)              | A <u>02</u> ,29; B40,44; C03,16; DRB104,07                   | 230                              | 65    |                   | B4002            | 2.0                          |
| E <sub>455-469</sub>   | GMSWFSQILIGTLLM                    | 1 (B)               | A <u>02</u> ,24; B35, <u>51</u> ; C01,01; DRB104,12          | 120                              | NT    | GMSWFSQILI        | A0201            | 0.9                          |
|                        |                                    | 77 (B)              | A <u>02</u> , <u>02</u> ; B40, <u>51</u> ; C04,07; DRB113,14 | 35                               | NT    | MSWFSQILI         | B5101            | 0.12                         |
| NS1 <sub>63-77</sub>   | MENIMWRSVEGELNA<br>MENIMWRSVEGELNA | 21 (B)              | A31,03; B35,18; C01,17; DRB1 <u>04</u> ,03                   | 65                               | 50    | MENIMWRSVEGELNA   | DRB10405         | 50                           |
|                        |                                    | 28 (C)              | A <u>02</u> ,29; B40,44; C03,16; DRB1 <u>04</u> ,07          | 245                              | 58    | IMWRSVEGEL        | A0217            | 0.5                          |
|                        |                                    | 56 (D)              | A <u>02</u> , <u>02</u> ; B15,18; C05,07; DRB103,11          | 70                               | 148   |                   | A0201            | 1.2                          |
| NS1 <sub>83-97</sub>   | GVQLTVVVGSVKNPM                    | 26 (D)              | A <u>02</u> ,24; B07,48; C01,07; DRB114,15                   | 145                              | 23    | VQLTVVVGSV        | A0201            | 1.7                          |
|                        |                                    | 28 (C)              | A <u>02</u> ,29; B40,44; C03,16; DRB104,07                   | 165                              | 35    |                   | A0217            | 3                            |
| NS1 <sub>163-177</sub> | FHTSVWLVKREDYSL<br>FHTSVWLVKREDYSL | 28 (C)              | A02,29; B40,44; C03,16; DRB1 <u>04</u> ,07                   | 230                              | 75    | HTSVWLKVREDY      | A0101            | 0.4                          |
|                        |                                    | 55 (C)              | A03,11; B35,51; C04,15; DRB101,07                            | 110                              | 125   | HTSVWLKVR         | A3101            | 0.4                          |
|                        |                                    | 46 (B)              | A32,68; B39,50; C06,07; DRB1 <u>04</u> ,07                   | 50                               | 32    |                   | A6801            | 0.6                          |
|                        |                                    | 20 (E)              | A01,31; B07,39; C07,07; DRB1 <u>04</u> ,15                   | 310                              | 105   | VWLKVREDY         | A2902            | 1.3                          |
|                        |                                    |                     |                                                              |                                  |       | FHTSVWLKV         | B3905            | 0.4                          |
|                        |                                    |                     |                                                              |                                  |       |                   | B3901            | 0.4                          |
| NS1 <sub>275-289</sub> | IRFEECPGTKVHVEE                    | 33 (C)              | A24,24; B15, <u>35</u> ; C01,03; DRB104,04                   | 215                              | 55    | CPGTKVHVE         | B3501            | 8.5                          |
|                        |                                    | 55 (C)              | A03,11; B <u>35</u> ,51; C04,15; DRB101,07                   | 130                              | 115   |                   | B3531            | 6.5                          |

*Continued*

**Table S1. Characteristics of antigenic peptides from ZIKV identified in this study – cont'd**

| Peptide <sup>a</sup>    | Sequence <sup>b</sup> | Donors <sup>c</sup> | HLA <sup>d</sup>                  | SFC/million<br>PBMC <sup>e</sup> |       | Predicted epitope | Predicted<br>HLA | Score<br>(rank) <sup>f</sup> |
|-------------------------|-----------------------|---------------------|-----------------------------------|----------------------------------|-------|-------------------|------------------|------------------------------|
|                         |                       |                     |                                   | 15-mer                           | 9-mer |                   |                  |                              |
| NS2B <sub>117-131</sub> | AAGAWYVYVKTGKRS       | 55 (C)              | A03,11; B35,51; C04,15; DRB101,07 | 445                              | NT    | AAGAWYVYVK        | A0301            | 0.6                          |
|                         |                       |                     |                                   |                                  |       |                   | A1101            | 0.12                         |
|                         |                       |                     |                                   |                                  |       | YVYVKTGKR         | A0301            | 1.8                          |
| NS3 <sub>219-233</sub>  | TVILAPTRVVAAEME       | 53 (D)              | A23,31; B40,44; C01,04; DRB107,08 | 100                              | NT    | TVILAPTRVVAAEME   | DRB10802         | 1.5                          |
|                         |                       | 66 (C)              | A02,03; B39,40; C03,07; DRB108,15 | 65                               | NT    | ILAPTRVVAA        | A0201            | 1.6                          |
| NS3 <sub>271-285</sub>  | LQPIRVPNYNLYIMD       | 42 (B)              | A26,26; B35,38; C05,06; DRB104,11 | 165                              | NT    | VPNYNLYIM         | B3501            | 0.06                         |
| NS3 <sub>311-325</sub>  | AAIFMTATPPGTRDA       | 28 (C)              | A02,29; B40,44; C03,16; DRB104,07 | 255                              | 85    | AAIFMTATPPGTRDA   | DRB10401         | 4                            |
|                         |                       |                     |                                   |                                  |       | FMTATPPGT         | A0217            | 5.5                          |
|                         | AAIFMTATPPGTRDA       | 33 (C)              | A24,24; B15,35; C01,03; DRB104,04 | 215                              | 30    | IFMTATPPG         | A2402            | 5                            |
| NS4A <sub>86-100</sub>  | VTLGASAWLMWLSEI       | 55 (C)              | A03,11; B35,51; C04,15; DRB101,07 | 178                              | NT    | SAWLMWLSEI        | B5101            | 0.9                          |
|                         |                       | 60 (B)              | A02,69; B55,58; C01,07; DRB111,13 | 125                              | NT    | VTLGASAWL         | A6901            | 1.3                          |
|                         |                       |                     |                                   |                                  |       | LGASAWLMW         | B5801            | 0.07                         |
| NS4B <sub>112-126</sub> | AIILLVAHYMYLIPG       | 28 (C)              | A02,29; B40,44; C03,16; DRB104,07 | 60                               | 58    | AIILLVAHY         | A2902            | 0.6                          |
|                         |                       | 37 (B)              | A02,11; B35,50; C04,06; DRB101,13 | 75                               | 30    |                   | A1101            | 3.5                          |
|                         | AIILLVAHYMYLIPG       | 60 (B)              | A02,69; B55,58; C01,07; DRB111,13 | 100                              | 68    | LLVAHYMYL         | A0205            | 0.3                          |
|                         | AIILLVAHYMYLIPG       | 60 (B)              | A02,69; B55,58; C01,07; DRB111,13 | 100                              | 35    | LVAHYMYLI         | A6901            | 0.15                         |
|                         |                       |                     |                                   |                                  |       |                   | A0205            | 0.2                          |
| NS5 <sub>13-27</sub>    | KARLNQMSALEFYYSY      | 55 (C)              | A03,11; B35,51; C04,15; DRB101,07 | 260                              | NT    | MSALEFYYSY        | B3501            | 0.15                         |
|                         |                       | 69 (E)              | A01,24; B35,35; C01,04; DRB104,13 | 145                              | NT    |                   | A0101            | 0.09                         |

*Continued*

**Table S1. Characteristics of antigenic peptides from ZIKV identified in this study – cont'd**

| Peptide <sup>a</sup>   | Sequence <sup>b</sup>    | Donors <sup>c</sup> | HLA <sup>d</sup>                                    | SFC/million<br>PBMC <sup>e</sup> |       | Predicted epitope | Predicted<br>HLA | Score<br>(rank) <sup>f</sup> |
|------------------------|--------------------------|---------------------|-----------------------------------------------------|----------------------------------|-------|-------------------|------------------|------------------------------|
|                        |                          |                     |                                                     | 15-mer                           | 9-mer |                   |                  |                              |
| NS5 <sub>293-307</sub> | WFFDEN <u>HPYRTWAYH</u>  | 55 (C)              | A03,11; B <u>35</u> ,51; C04,15; DRB101,07          | 1580                             | 308   | HPYRTWAYH         | B3501            | 0.4                          |
|                        | W <u>FFDENHPYRTWAYH</u>  | 69 (E)              | A01,24; B <u>35,35</u> ; C01,04; DRB104,13          | 40                               | 218   | FFDENHPY          | A0101            | 1.6                          |
| NS5 <sub>297-311</sub> | <u>ENHPYRTWAYH</u> GSGYE | 55 (C)              | A03,11; B <u>35</u> ,51; C04,15; DRB101,07          | 1280                             | 358   | NHPYRTWAY         | B3501            | 3                            |
|                        | ENHP <u>YRTWAYHGS</u> YE | 69 (E)              | A01,24; B <u>35,35</u> ; C01,04; DRB104,13          | 75                               | 188   | YRTWAYHGSY        | B3501            | 1.7                          |
|                        | ENHPY <u>RTWAYHGS</u> YE | 69 (E)              | A01,24; B <u>35,35</u> ; C01,04; DRB104,13          | 75                               | 205   | RTWAYHGSY         | A0101            | 0.3                          |
| NS5 <sub>345-359</sub> | TDT <u>TPYGQQRVF</u> KEK | 33 (C)              | A24,24; B15, <u>35</u> ; C01,03; DRB104,04          | 1315                             | 395   | TPYGQQRVF         | B3531            | 0.7                          |
|                        |                          | 55 (C)              | A03,11; B <u>35</u> ,51; C04,15; DRB101,07          | 2095                             | 523   |                   | B3501            | 0.3                          |
|                        |                          | 69 (E)              | A01,24; B <u>35</u> ,35; C01,04; DRB104,13          | 785                              | 763   |                   |                  |                              |
| NS5 <sub>425-439</sub> | <u>EAVNDPRFW</u> ALVDKE  | 28 (C)              | A02,29; B40,44; C03,16;DRB104,07                    | 150                              | 100   | AVNDPRFWALVDK     | A0301            | 1.1                          |
|                        |                          | 55 (C)              | A03,11; B35,51; C04,15; DRB101,07                   | 120                              | 125   |                   | A1101            | 0.6                          |
|                        |                          | 56 (D)              | A02,02; B15,18; C05,07; DRB103,11                   | 90                               | 240   |                   |                  |                              |
| NS5 <sub>461-475</sub> | KKQGEFGKAKGSRAI          | 28 (C)              | A02,29; B <u>40</u> ,44; C03,16;DRB104, <u>07</u>   | 300                              | NT    | KKQGEFGKAKGSRAI   | DRB10701         | 32                           |
|                        |                          | 53 (D)              | A23,31; B <u>40</u> ,44; C01,04; DRB1 <u>07</u> ,08 | 105                              | NT    | GEFGKAKGSRAI      | B4002            | 0.7                          |
| NS5 <sub>473-487</sub> | RAIWMWLGARFLEF           | 28 (C)              | A02,29; B40,44; C03,16; DRB104, <u>07</u>           | 210                              | NT    | YMWLGARFL         | A0217            | 0.03                         |
|                        |                          | 55 (C)              | A03,11; B35,51; C04,15; DRB101, <u>07</u>           | 295                              | NT    | AIWYMWLGAR        | A0301            | 1.3                          |
|                        |                          |                     |                                                     |                                  |       | RAIWMWLGARFLEF    | DRB10701         | 16                           |

*Continued*

**Table S1. Characteristics of antigenic peptides from ZIKV identified in this study – cont'd**

| Peptide <sup>a</sup>   | Sequence <sup>b</sup>    | Donors <sup>c</sup> | HLA <sup>d</sup>                           | SFC/million<br>PBMC <sup>e</sup> |       | Predicted epitope | Predicted<br>HLA | Score<br>(rank) <sup>f</sup> |
|------------------------|--------------------------|---------------------|--------------------------------------------|----------------------------------|-------|-------------------|------------------|------------------------------|
|                        |                          |                     |                                            | 15-mer                           | 9-mer |                   |                  |                              |
| NS5 <sub>546-560</sub> | RFDLENEALITNQME          | 28 (C)              | A02,29; <b>B40</b> ,44; C03,16; DRB104,07  | 245                              | NT    | NEALITNQM         | B4002            | 0.8                          |
|                        |                          | 53 (D)              | A23,31; <b>B40</b> ,44; C01,04; DRB107,08  | 190                              | NT    |                   | B4403            | 0.6                          |
|                        |                          | 66 (C)              | A02,03; B39, <b>40</b> ; C03,07; DRB108,15 | 80                               | NT    |                   | B3901            | 1.8                          |
| NS5 <sub>565-579</sub> | LALAIKYYTYQNKVV          | 28 (C)              | A02,29; <b>B40</b> ,44; C03,16; DRB104,07  | 240                              | NT    | LALAIKYYTY        | A2902            | 0.5                          |
|                        |                          | 53 (D)              | A23,31; <b>B40</b> ,44; C01,04; DRB107,08  | 120                              | NT    | ALAIKYYTY         | A2902            | 0.25                         |
|                        |                          | 56 (D)              | A02,02; B15,18; C05,07; DRB103,11          | 150                              | NT    | LALAIKYYTY        | B1517            | 1.2                          |
| NS5 <sub>605-619</sub> | QVVTY <u>ALNTFTNL</u> VV | 33 (C)              | A <u>24,24</u> ; B15,35; C01,03; DRB104,04 | 240                              | NT    | TYALNTFTNL        | A24:02           | 0.09                         |
|                        |                          | 59 (B)              | A03, <b>24</b> ; B35,40; C01,03; DRB104,04 | 50                               | 42    | YALNTFTNL         | B35:43           | 0.4                          |
|                        |                          |                     |                                            |                                  |       |                   | B35:31           | 0.25                         |

<sup>a</sup> The position of peptides were determined according to NCBI Reference Sequence YP\_002790881.1; <sup>b</sup> The underlined and in bold sequence correspond to the 9-mer peptide tested; <sup>c</sup> The letters in brackets refer to the group of donors indicated in Table 1; <sup>d</sup> The common alleles between donors are underlined and in bold; <sup>e</sup> Cumulative SFC/million PBMC; NT, not tested; <sup>f</sup> Calculated using NetMHCpan 3.0 Server: strong binders <0.5, weak binders <2.
